# Supplementary material for: Characterization of new RNA polymerase III and RNA polymerase II transcriptional promoters in the Bovine Leukemia Virus genome
Source: PubMed Central journal article supplement (PMC4992882; doi:10.1038/srep31125), 2016-08-22
Supplement: srep31125-s1.pdf [file srep31125-s1.pdf]

# **Characterization of new RNA polymerase III and RNA polymerase II transcriptional promoters in the Bovine Leukemia Virus genome**

Short title: New promoters in the BLV genome

Benoit Van Driessche<sup>1,#</sup>, Anthony Rodari<sup>1,#</sup>, Nadège Delacourt<sup>1</sup>, Sylvain Fauquenoy<sup>1</sup>,  
Caroline Vanhulle<sup>1</sup>, Arsène Burny<sup>1</sup>, Olivier Rohr<sup>2,3,\$</sup>, Carine Van Lint<sup>1,\$,\*</sup>.

<sup>1</sup> Service of Molecular Virology, Department of Molecular Biology (DBM), Université Libre de Bruxelles (ULB), Gosselies, B-6041, Belgium.

<sup>2</sup> Institut Universitaire de Technologie Louis Pasteur de Schiltigheim, University of Strasbourg, Schiltigheim, F-67300, France.

<sup>3</sup> Institut de Parasitologie et de Pathologie Tropicale, Laboratory of Dynamic of Host-Pathogen Interactions (DHPI), EA7292, University of Strasbourg, Strasbourg, F-67000, France.

\* To whom correspondence should be addressed. Tel: +32 2 650 98 07

Fax: +32 2 650 98 00

Email: [cvlint@ulb.ac.be](mailto:cvlint@ulb.ac.be)

<sup>#,\$</sup> These authors contributed equally to this work

a

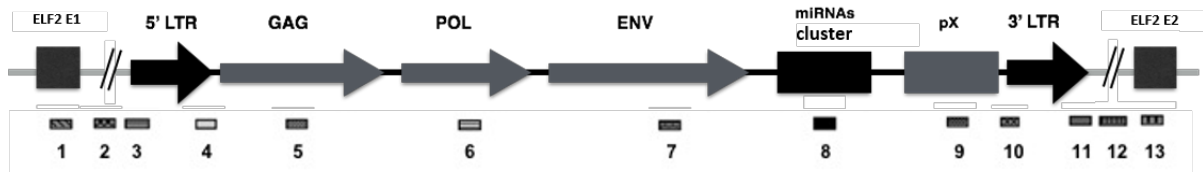

b

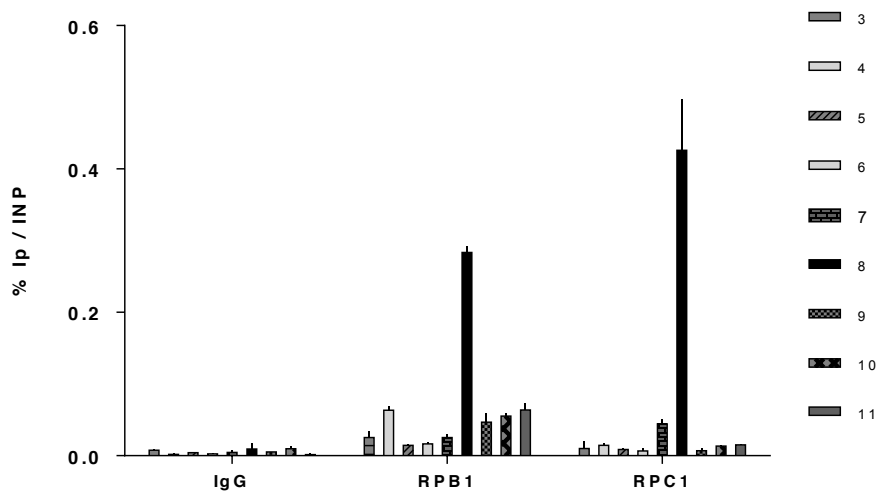

**Figure S1. In vivo binding of RNAPIII to the BLV miRNA cluster in latently-infected YR2 ovine cells.**

**a.** Schematic representation of the BLV provirus in latently-infected YR2 ovine cells. The localization of the different amplified regions is presented below the provirus. **b.** Chromatin prepared from YR2 cells was immunoprecipitated with specific antibodies directed against the largest subunit of the RNAPII or RNAPIII (RPB1 or RPC1, respectively) or with a purified IgG to measure aspecific immunoprecipitation background. Results are presented as histograms indicating percentages of immunoprecipitated DNA compared to the input DNA (% IP/INP). Data are the means  $\pm$  SEM from one representative of at least three independent experiments.

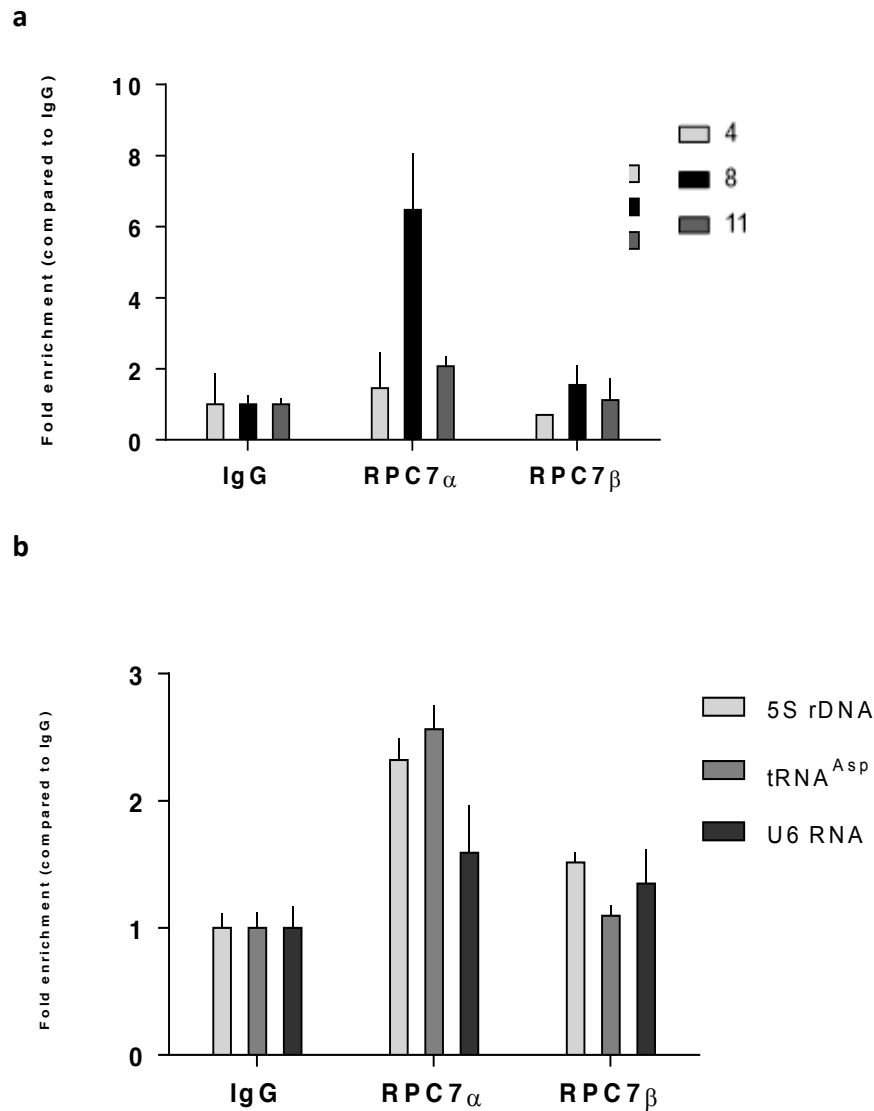

**Figure S2. Recruitment of the RPC7 $\alpha$  and RPC7 $\beta$  subunits to the BLV miRNA cluster in latently-infected YR2 ovine cells.**

Chromatin prepared from YR2 cells was immunoprecipitated with specific antibodies directed against the two isoforms of the RNAPIII RPC7 subunit or with a purified IgG as background measurement. Purified DNA was then amplified with oligonucleotide primers hybridizing to three BLV regions: the 5'-LTR, the miRNA cluster or the 3'-LTR/host junction region (**a**) or to the class III control cellular genes (**b**). Results are presented as histograms indicating fold enrichment compared to IgG for which a value of 1 was assigned. Data are the means  $\pm$  SEM of duplicates samples from one representative of at least three independent experiments.

YR2

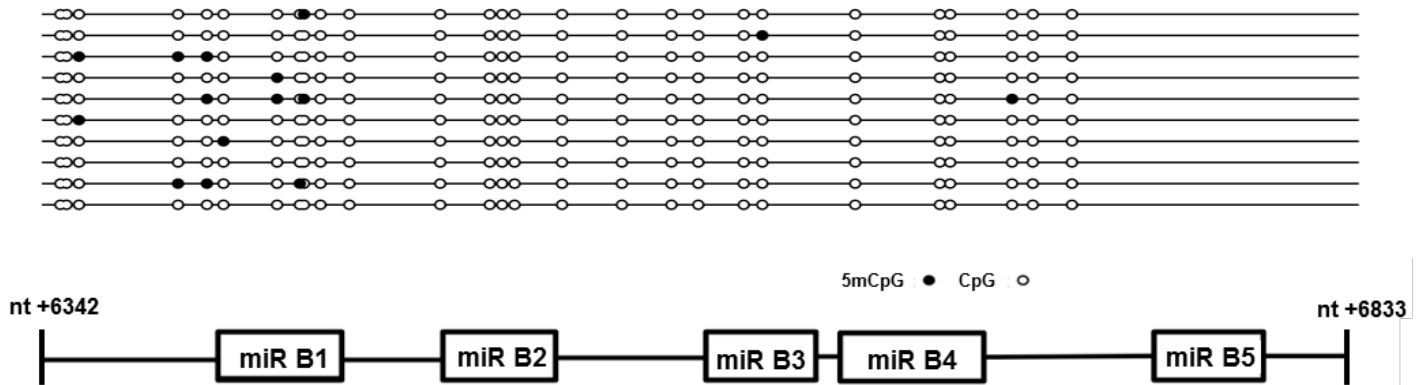

**Figure S3. The BLV miRNA cluster DNA is not methylated in latently-infected YR2 ovine cells.**

Genomic DNA from YR2 cells was extracted and treated by sodium bisulfite and the miRNA cluster was amplified by nested PCR. The amplified products were cloned in a TA cloning vector and 10 independent clones were sequenced. Open and filled circles represent non-methylated and methylated CpG dinucleotides, respectively. The position of the 5 BLV-pre-miRs within the miRNA cluster is presented in the lower part of the figure.

| Name of primer |                        | Sequences                                                    |
|----------------|------------------------|--------------------------------------------------------------|
| CV3311         | Stemloop BLV-miR-B4-3p | 5'...gtcgtatccagtgcaggggtccgaggtattcgactggatacgacaaaggc...3' |
| CV3331         | Stemloop miR-191       | 5'...gtcgtatccagtgcaggggtccgaggtattcgactggatacgaccagctg...3' |
| CV3333         | Stemloop BLV-miR-B2-5p | 5'...gtcgtatccagtgcaggggtccgaggtattcgactggatacgactctgcg...3' |
| CV3321         | miRNAs bs Fwd          | 5'...tgattatcaggccttgctaccatc...3'                           |
| CV3322         | miRNAs bs Rev          | 5'...gaagggactttatgggcactgtagaa...3'                         |
| CV3323         | miRNAs bs nested Fwd   | 5'...ccagagatctactctcacctctcccc...3'                         |
| CV3324         | miRNAs bs nested Rev   | 5'...gcccaaatgctgctggatgtggctgg...3'                         |
| CV3380         | miRNAs cluster Fwd     | 5'...gtcagcaccatgtttcagcacc...3'                             |
| CV3381         | miRNAs cluster Rev     | 5'...gctagcagatctgacctttggaagagatattg...3'                   |
| CV3451         | MTE/DPE Fwd            | 5'...acaagcgcgggtgcaagccatgattccttgagcgcggggtcagg...3'       |
| CV3452         | MTE/DPE Rev            | 5'...cctgaccccgctccaaggaatcatggtctgcaccgcgcttgt...3'         |
| CV3453         | BRE Fwd                | 5'...tgccggtgtctcctggccgtagataacgccgaaggagagagcg...3'        |
| CV3454         | BRE Rev                | 5'...cgctctccttcggcgttatctagcggccaggagagaccggcaa...3'        |

Table S1 : List of PCR primers used in this study

| <b>Antibody</b>   | <b>Reference</b> | <b>Origin</b>       |
|-------------------|------------------|---------------------|
| IgG               | I-1000           | Vector Laboratories |
| RPB1              | SC-899           | Santa Cruz          |
| TBP               | Mab-TBPCSH-100   | Diagenode           |
| Bdp1              | 2663             | Dr B. White         |
| Brf1              | 128              | Dr B. White         |
| Brf2              | 940.005          | Dr N. Hernandez     |
| TFIIIC            | 4286             | Dr B. White         |
| TFIIIA            | ab76894          | Abcam               |
| RPC1              | CS377            | Dr N. Hernandez     |
| RPC1'             | SC-1900          | Santa Cruz          |
| RPC4              | CS681            | Dr N. Hernandez     |
| RPC6              | ab151495         | Abcam               |
| RPC7 $\alpha$     | SC3070           | Dr N. Hernandez     |
| RPC7 $\beta$      | SC3072           | Dr N. Hernandez     |
| H3K27me3          | 07-449           | Millipore           |
| H3K4me2           | 07-030           | Millipore           |
| H3K4me3           | 04-745           | Millipore           |
| H3K36me3          | ab-9050          | Abcam               |
| H3K9me3           | 07-442           | Millipore           |
| H3ac              | 06-599           | Millipore           |
| H3K9ac            | pAb-ACHAHS-044   | Diagenode           |
| H2AZ              | 17-10048         | Millipore           |
| $\alpha$ -tubulin | T5168            | Sigma               |

**Table S2 : List of antibodies used in this study**

| Name of primer | Genomic localization        | Viral localization (nt +1 = first nucleotide of the 5'LTR) | Sequences                             |
|----------------|-----------------------------|------------------------------------------------------------|---------------------------------------|
| CV3168         | <i>Rasa3 E1</i>             |                                                            | 5'...gaccagcatggcggtggag...3'         |
| CV3169         | <i>Rasa3 E1</i>             |                                                            | 5'...ccgcctgctcctgcgaactc...3'        |
| CV3170         | <i>Rasa3 I1</i>             |                                                            | 5'...catacctccctggccccgct...3'        |
| CV3171         | <i>Rasa3 I1</i>             |                                                            | 5'...cagaagcaccgctccaa...3'           |
| CV3174         | Jonction 5'                 |                                                            | 5'...ccggcagcttctgaccgag...3'         |
| CV3175         | Jonction 5'                 | nt 9 – nt 28 and nt 8198 –nt 8217                          | 5'...cgcttagccggcatgatct...3'         |
| CV3123         | LTR 5'                      | nt 423 – nt 442 and nt 8612 – nt 8631                      | 5'...aagggcgtctggctgcacc...3'         |
| CV3124         | LTR 5'                      | nt 533 – nt 552                                            | 5'...aatccggagcagccccaa...3'          |
| CV3028         | <i>gag</i>                  | nt 1263 – nt 1282                                          | 5'...agcccaacgccgggatctt...3'         |
| CV3029         | <i>gag</i>                  | nt 1357 – nt 1376                                          | 5'...cggggccttgacgatggtg...3'         |
| CV3032         | <i>pol</i>                  | nt 3616 – nt 3635                                          | 5'...ttctgctggcccttgcctc...3'         |
| CV3033         | <i>pol</i>                  | nt 3740 – nt 3759                                          | 5'...agcccgcaagagacctgct...3'         |
| CV3038         | <i>env</i>                  | nt 5920 – nt 5939                                          | 5'...ccagaaccgacggggcctg...3'         |
| CV3039         | <i>env</i>                  | nt 6030 – nt 6049                                          | 5'...gctggagatcaccgaggcgg...3'        |
| CV3127         | miRNAs                      | nt 6804 – nt 6823                                          | 5'...acgccctgtgcacaccctt...3'         |
| CV3128         | miRNAs                      | nt 6927 – nt 6946                                          | 5'...ctcagaaccggggccttgc...3'         |
| CV3044         | <i>Tax<sub>BLV</sub> E2</i> | nt 7752 – nt 7771                                          | 5'...ctgtggacccctccggct...3'          |
| CV3045         | <i>Tax<sub>BLV</sub> E2</i> | nt 7849 – nt 7869                                          | 5'...agggctcgcctaggggtagaa...3'       |
| CV3046         | LTR3'                       | nt 8095 – nt 8119                                          | 5'...tggttgctagcgggaaactaagact...3'   |
| CV3047         | LTR3'                       | nt 31 – nt 50 and nt 8014 – nt 8033                        | 5'...ctggtttacggggcgggtggc...3'       |
| CV3176         | Jonction 3'                 | nt 423 – nt 442 and nt 8612 – nt 8631                      | 5'...aagggcgtctggctgcacc...3'         |
| CV3177         | Jonction 3'                 |                                                            | 5'...ggcctcagattccgacctg...3'         |
| CV3179         | <i>Rasa3 I2</i>             |                                                            | 5'...tcccagccttaggtgtgcc...3'         |
| CV3180         | <i>Rasa3 I2</i>             |                                                            | 5'...ctcctctcccagggcagct...3'         |
| CV3181         | <i>Rasa3 E2</i>             |                                                            | 5'...tcccacataccggggccaa...3'         |
| CV3182         | <i>Rasa3 E2</i>             |                                                            | 5'...tggctctgaaaacctcctcctggt...3'    |
| CV3044         | <i>tRNA<sup>Asp</sup></i>   |                                                            | 5'...tcgttagtatagtggtgagtatccccg...3' |
| CV3045         | <i>tRNA<sup>Asp</sup></i>   |                                                            | 5'...ggggaatcgaaccccggtctcc...3'      |
| CV3357         | <i>5S rDNA</i>              |                                                            | 5'...tggccataccacatgaatgacc...3'      |
| CV3358         | <i>5S rDNA</i>              |                                                            | 5'...cgatccaagtactaaccaggtccaagc...3' |
| CV3335         | <i>U6 RNA</i>               |                                                            | 5'...cgcttcacgaattgcgtgtcat...3'      |
| CV3359         | <i>U6 RNA</i>               |                                                            | 5'...tgctcgcttcggcagcacat...3'        |
| CV3360         | <i>7SK RNA</i>              |                                                            | 5'...ggctaggcgggtgtcccctt...3'        |
| CV3361         | <i>7SK RNA</i>              |                                                            | 5'...tcgtcctcttcgaccgagcg...3'        |
| CV3312         | miR-B4-3p                   | nt 6745 – nt 6757                                          | 5'...agcaccacagtct...3'               |
| CV3332         | miR-191                     |                                                            | 5'...cggcggcaacggaaucacaaa...3'       |
| CV3334         | miR-B2-5p                   | nt 6508 – nt 6521                                          | 5'...cggcggatgactgagtgtag...3'        |
| CV3313         | Stemloop                    |                                                            | 5'...gtgagggtccgaggt...3'             |
| CV2564         | <i>Fluc</i>                 |                                                            | 5'...cccgcgaacgacattataa...3'         |
| CV2565         | <i>Fluc</i>                 |                                                            | 5'...ttggaaacgaacaccagc...3'          |
| CV2004         | <i>GAPDH</i>                |                                                            | 5'...gccccggtttctataaattg...3'        |
| CV2005         | <i>GAPDH</i>                |                                                            | 5'...agaagatgcggctgactgtc...3'        |

Table S3 : List of qPCR primers used in this study
